# Supplementary material
Source: PubMed Central journal article supplement (PMC4568217)

# FACS gating strategy and representative plots

CD45<sup>+</sup> live

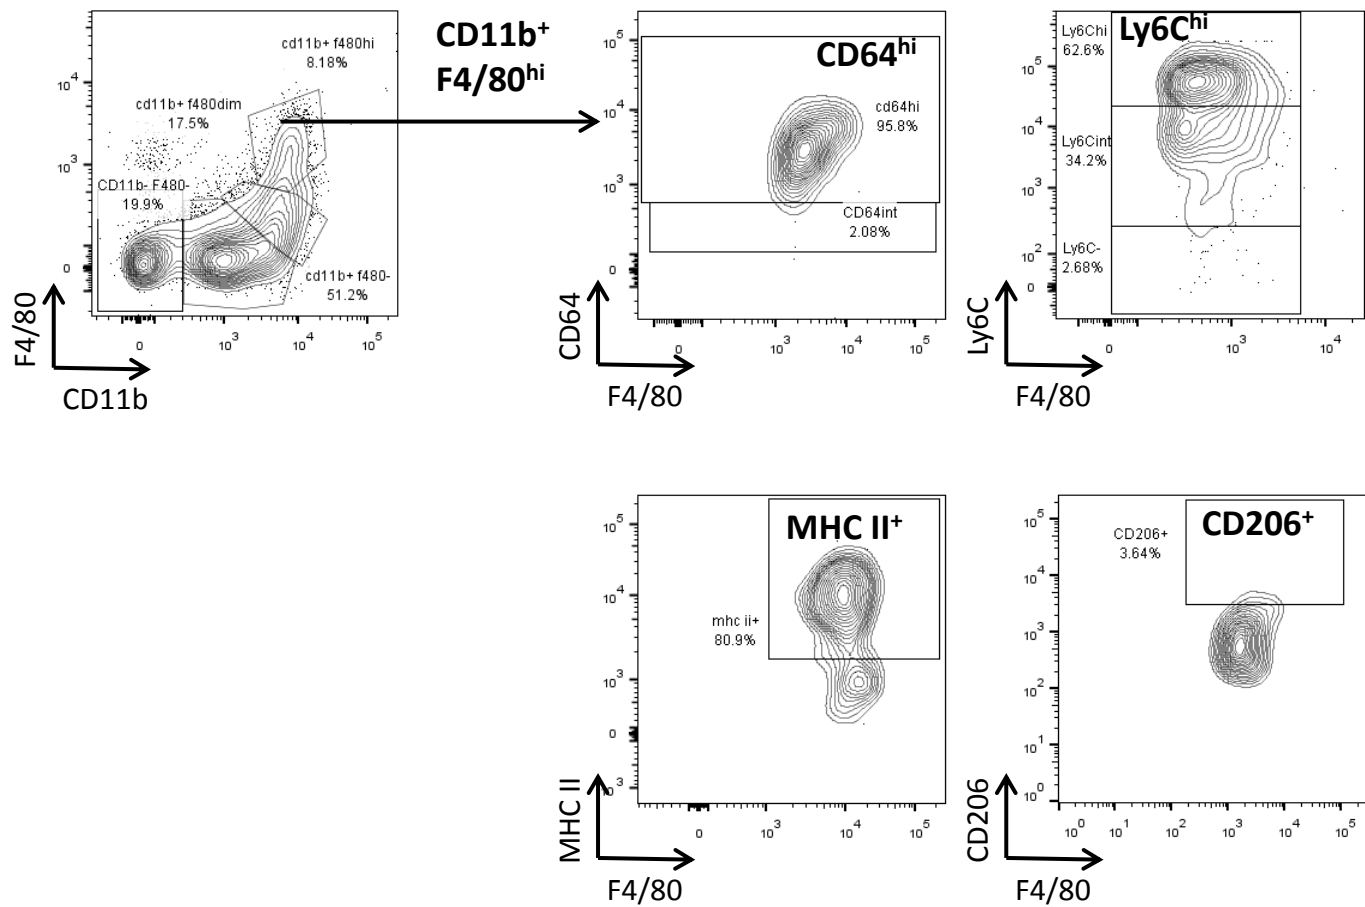

**Gating strategy used to identify macrophage populations in the inflamed knee.**

Images show representative plots of mBSA challenged joints collected at day two of AIA. A viability dye was used to exclude dead cells from the analysis. All samples were first gated on haematopoietic CD45<sup>+</sup> live cells. Gates were set based on FMO (fluorescence minus one) controls excluding any background staining or autofluorescence. Macrophages were defined as CD11b<sup>+</sup> F4/80<sup>hi</sup> and then analysed for expression of CD64, Ly6C, MHC II and CD206.

# Macrophages IRF5 KO mBSA, gated on FMOs

Day 2

CD45<sup>+</sup> live

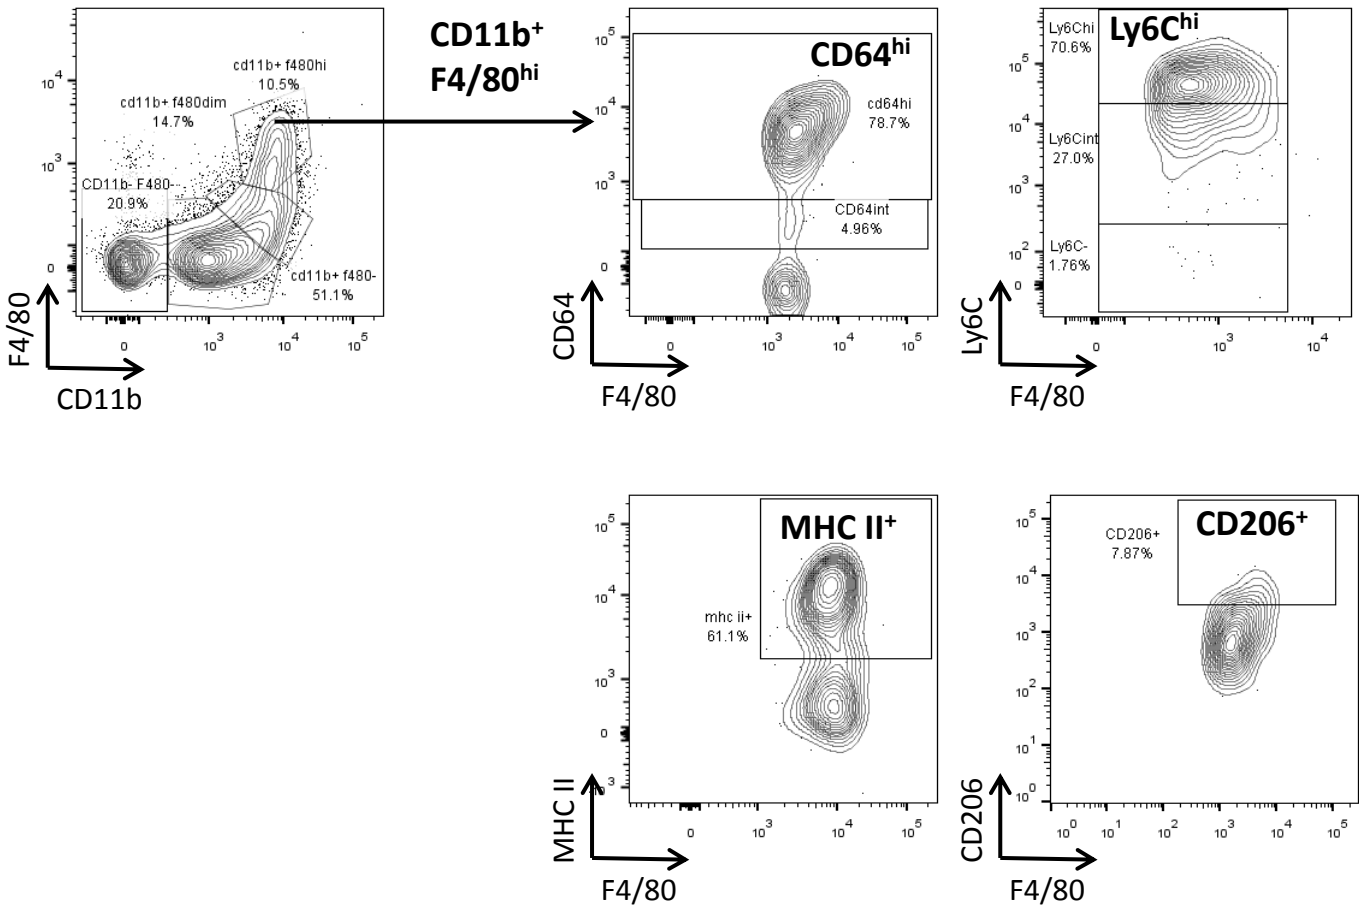

# Monocytes WT mBSA, gated on FMOs

Day 2

CD45<sup>+</sup> live

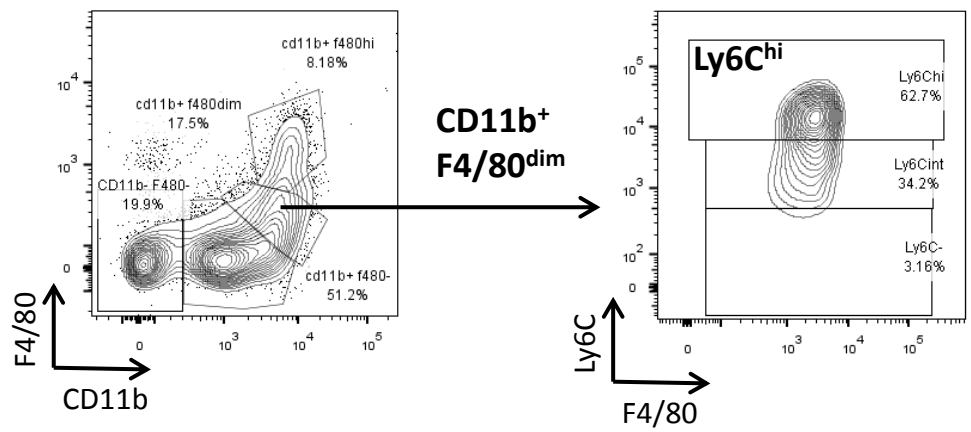

# Neutrophils WT mBSA, gated on FMOs

CD45<sup>+</sup> live

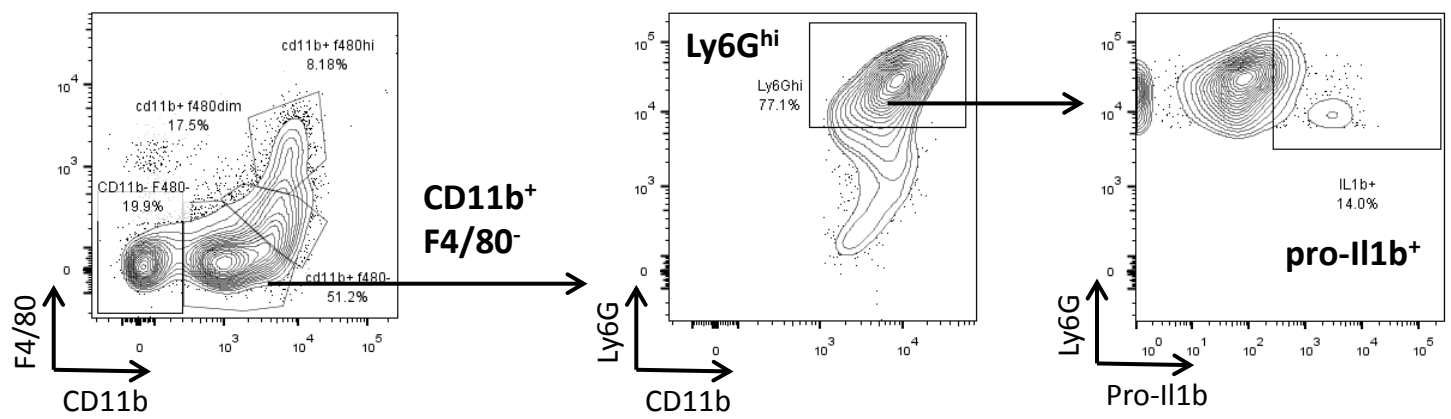

### Gating strategy applied to detect monocytes and neutrophils in the challenged knee joint.

Plots are representative for mBSA knees collected at day two of AIA. Using a viability dye dead cells were excluded from the analysis. All samples were gated on haematopoietic CD45<sup>+</sup> live cells before sub-gating. FMO controls were used to set all gates. Monocytes were defined as CD11b<sup>+</sup> F4/80<sup>dim</sup> and Ly6C expression was analysed. Neutrophils were generally defined as CD11b<sup>+</sup> F4/80<sup>-</sup> Ly6G<sup>hi</sup> and pro-IL1beta allowed for identification of activated neutrophils.

# Monocytes IRF5 KO mBSA, gated on FMOs

Day 2

CD45<sup>+</sup> live

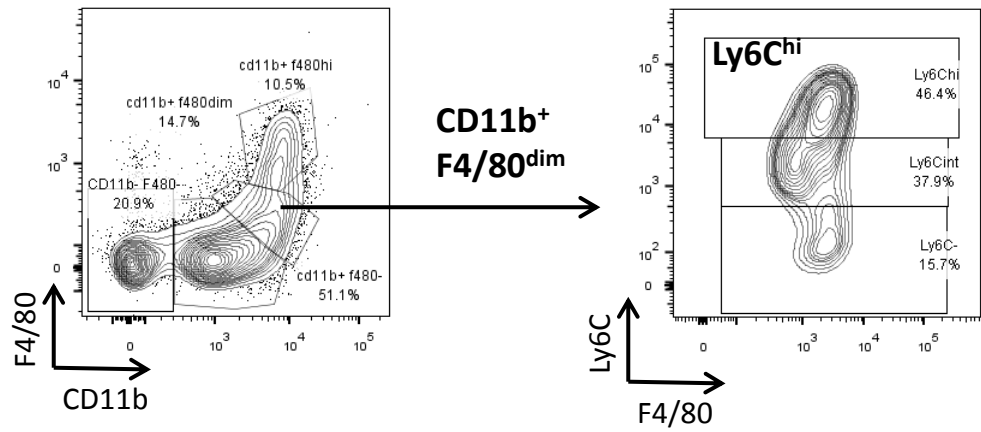

# Neutrophils IRF5 KO mBSA, gated on FMOs

CD45<sup>+</sup> live

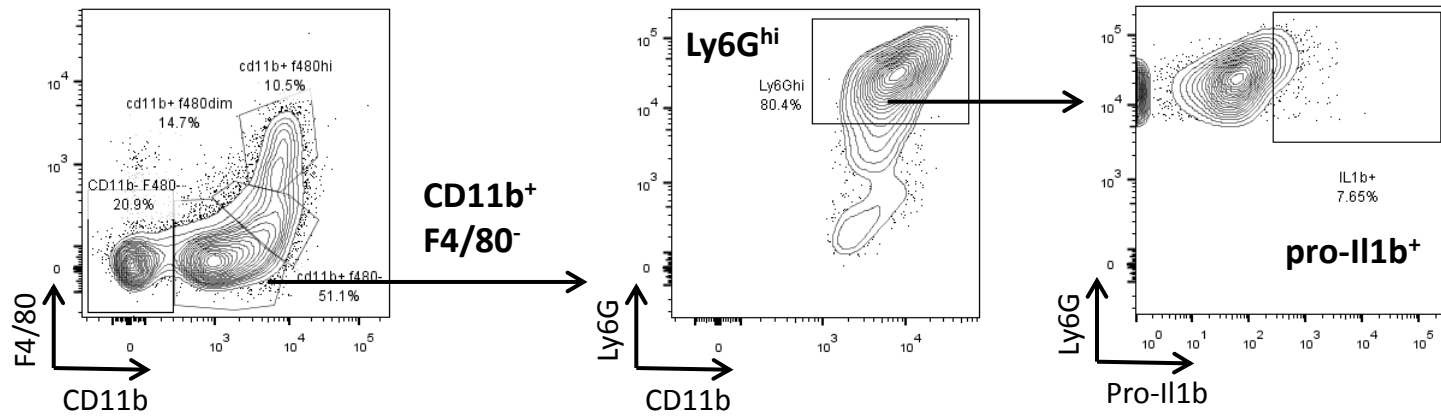

### DCs WT mBSA, gated on FMOs

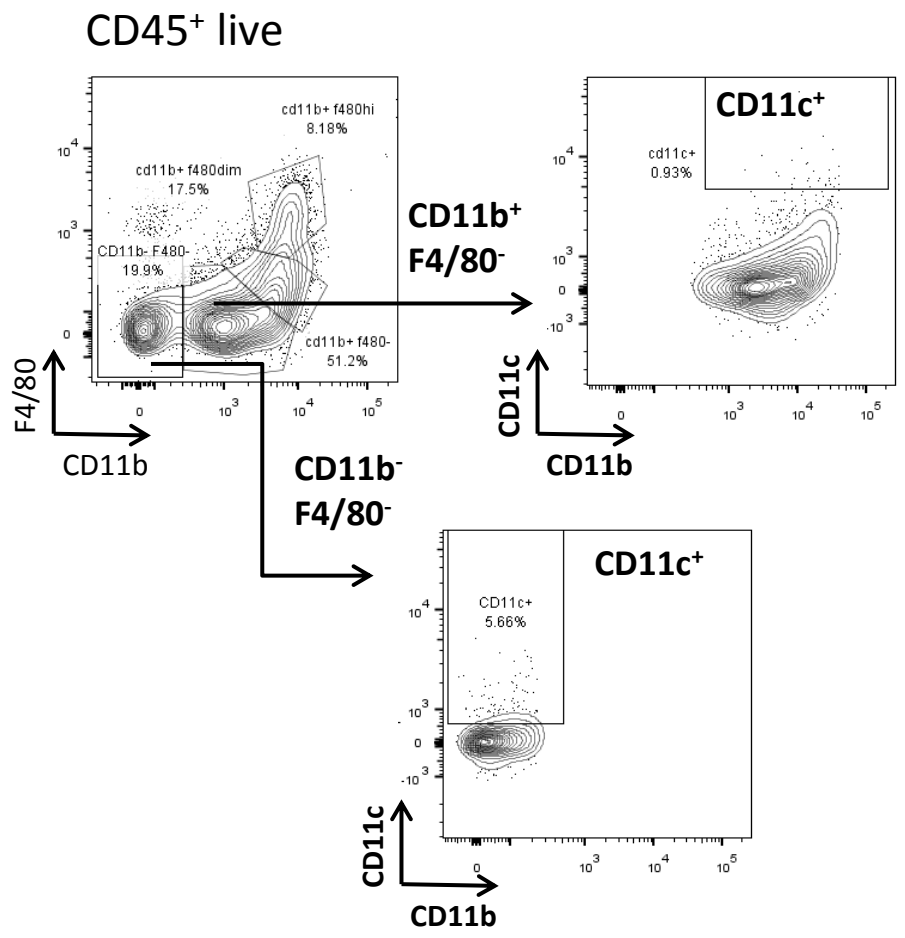

### DCs IRF5 KO mBSA, gated on FMOs

Day 2

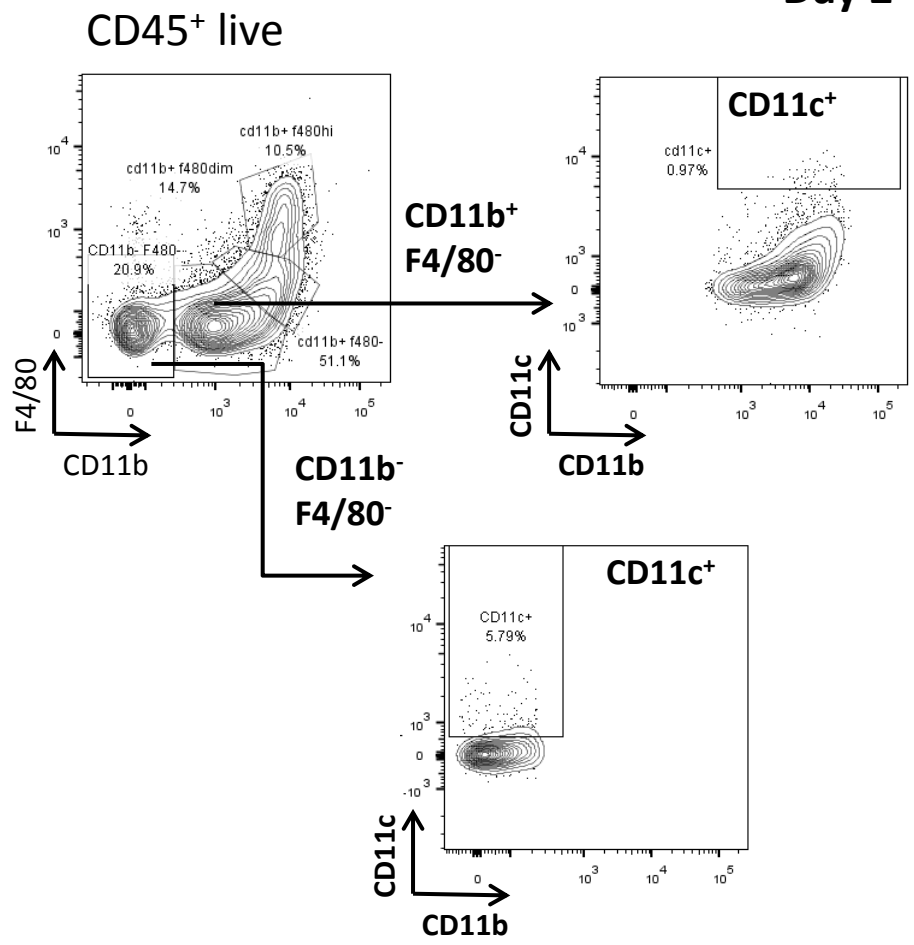

### Representative FACS plots for the dendritic cell gating strategy.

Images shown are from mBSA knees collected after two days of AIA. Samples were gated on haematopoietic CD45<sup>+</sup> live cells prior to further gating. Gates were set based on background staining in FMO controls. Two DC populations were identified based on their CD11c expression in either the CD11b<sup>+</sup> F4/80<sup>-</sup> or CD11b<sup>-</sup> F4/80<sup>-</sup> gates.

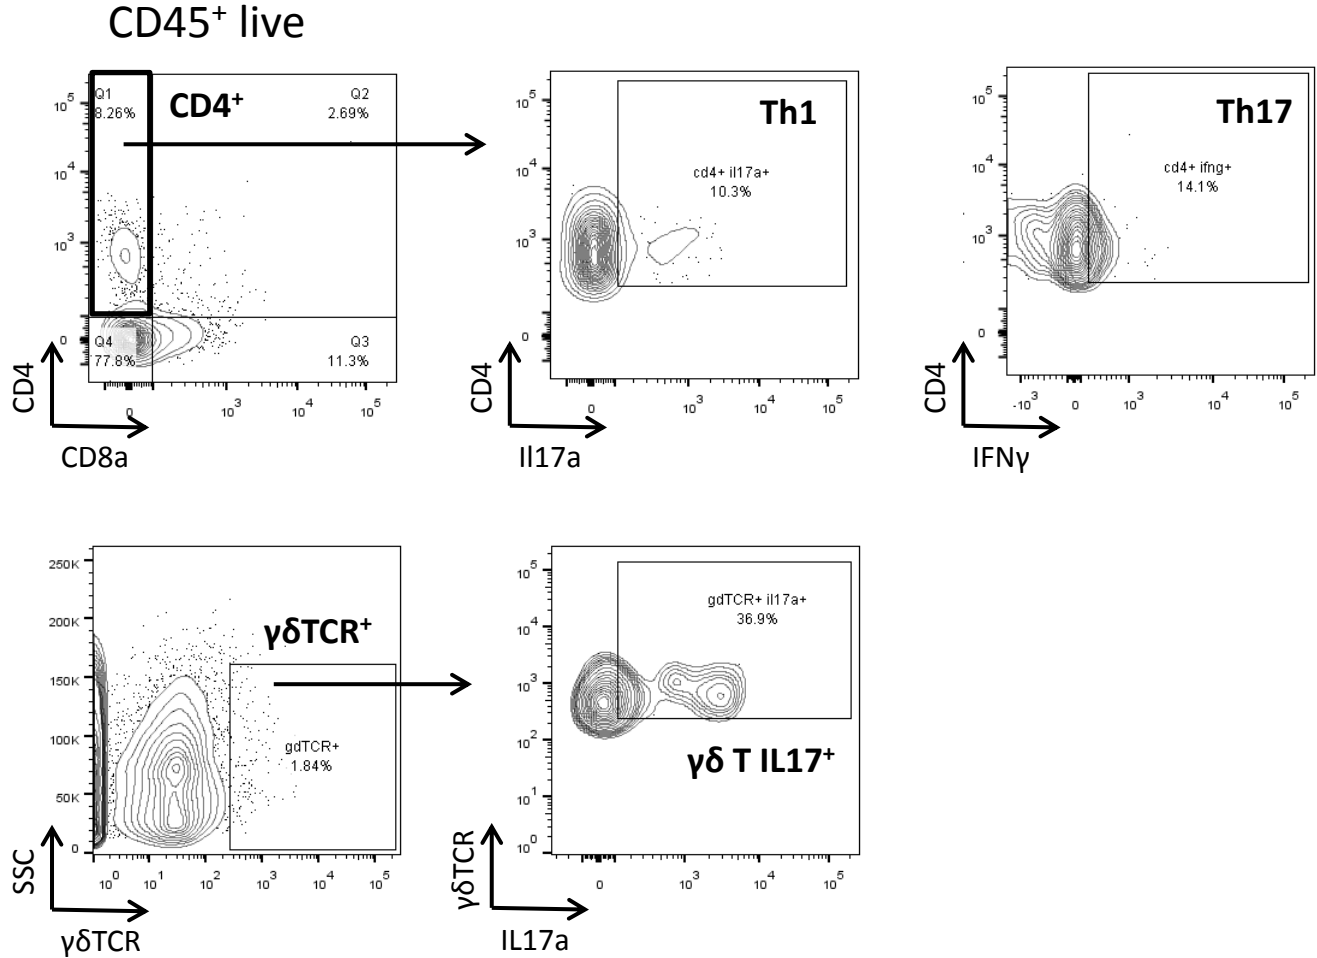

**Gating strategy used to identify T-cell subsets in the inflamed knee.**

Images shown are representative plots of mBSA challenged joints collected at day seven of AIA. A viability dye was used to exclude dead cells from the analysis and all samples were first gated on haematopoietic CD45<sup>+</sup> live cells. Gates were set based on FMO controls. **A.** T-cells were gated as CD4<sup>+</sup> CD8a<sup>-</sup> and then further gated on IL17a and IFN $\gamma$  expression to identify T-cell subsets. **B.** IL17a producing  $\gamma\delta$  T-cells were first gated on  $\gamma\delta$ TCR expression and then IL17a staining.

# T-cells IRF5 KO mBSA, gated on FMOs, day 7

Day 7

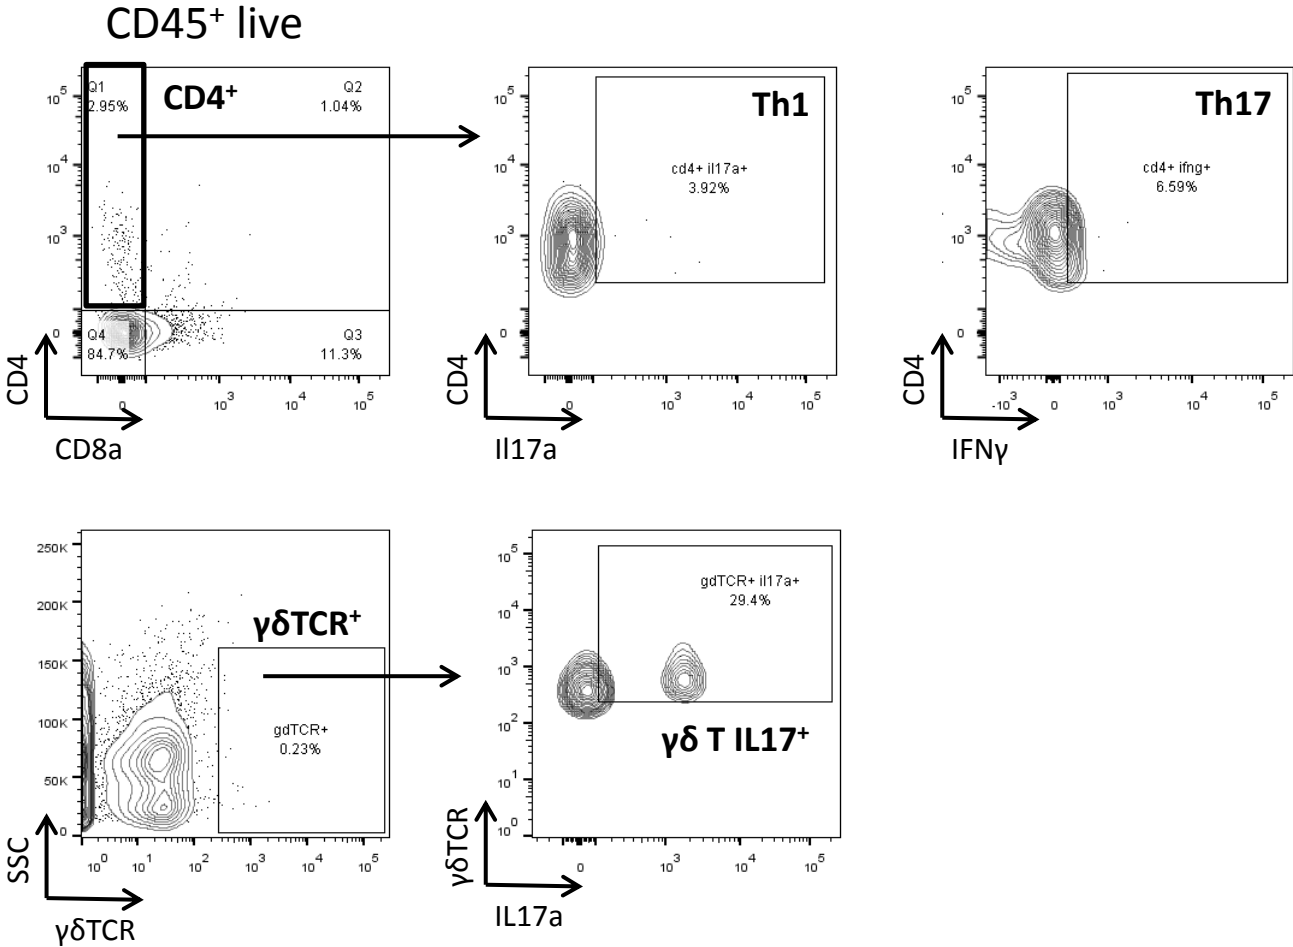

Supplement: pnas.1506254112.sapp.pdf [file pnas.1506254112.sapp.pdf]
